# Supplementary material
Source: publisher site journal article supplement (https://www.dovepress.com/article/342008)
Supplement: Supplementary file 1 [file get_supplementary_file.php]

*Supporting information for*

**Effective combination of isoniazid and core-shell magnetic nanoradiotherapy against gastrointestinal tumor cell types**

Hao Chen1, Daoming Zhu1, Liang Guo2*, Guoxin Li1*

1Department of General Surgery & Guangdong Provincial Key Laboratory of Precision Medicine for Gastrointestinal Tumor, Nanfang Hospital, The First School of Clinical Medicine, Southern Medical University, Guangzhou, Guangdong, 510515, China.

2Department of Plastic Surgery, Zhongnan Hospital of Wuhan University, Wuhan, 430071, China

Corresponding author:

Email: Liang Guo: guoliangwhzn@163.com

Guoxin Li: gzliguoxin@163.com

**Experimental Section**

***In vitro* experiment principle test**

***In vitro* •OH generation:** A weakly acidic solution containing 10 μg/mL methylene blue (MB) and 200 μg/mL NPs+200 μg/mL INH was stored at 37℃ for 24 h. The degradation of MB was detected by UV-Vis absorption spectroscopy to verify the generation of reactive oxygen species (ROS).

**GSH consumption** **capacity:** To investigate the dependence of NPs concentration on GSH consumption, 500 μL NPs with the concentrations of 0, 0.05, 0.10, 0.15 and 0.20 mg/mL were co-incubated with 10 μL glutathione (GSH) (2.5×103) at 37℃ for 3 h, respectively. The supernatant was then collected for GSH analysis using the GSH kit (Sigma-Aldrich).

**Cytocompatibility tests:** CCK-8 was used to detect the cytocompatibility of different concentrations of NPs. AGS cells were inoculated in 96-well plates at the density of 5000 cells per well and incubated overnight in an incubator at 37℃ with 5% CO2. The cells were divided into 8 groups with 5 wells in each group. On the second day, different concentrations of NPs (0, 12.5, 25, 50, 100, 200, 400, 1000 μg/mL) were added to each group for overnight culture, and on the third day, 10μL CCK-8 was added and incubated for 2 h. The absorbance value at 450 nm was measured with a microplate analyzer (Rayto-6000 system, Rayto, China).

**Fluorescence analysis of intracellular DNA damage:** The DNA damage of each group was detected by γ-H2AX antibody. AGS cells were incubated in 24-well plates and cultured at 37℃ for 24 h. They were divided into 5 groups: (1) Control; (2) RT; (3) NPs; (4) NPs+INH; (5) NPs+INH+RT. After corresponding treatment, the old culture medium was discarded, fixed with 4% paraformaldehyde at 4℃ for 15 minutes and washed with PBS for 3 times. Triton-x-100 with a volume fraction of 0.2% was used for film breaking at 4℃ for 15 minutes, then closed at room temperature for 2h, and washed with PBS for 3 times. The cells were stained with DAPI and secondary anti-γ H2AX antibodies (5% FBS and 1% Tri-X-100) and incubated in the dark. After washing with PBS, the cells were sealed with 90% glycerin and covered glass with the cells facing down. The immunofluorescence analysis of the cells was performed using a fluorescence microscope (IX81, Olympus, Japan).

***In Vitro* Cytotoxicity analysis (CCK-8):** CCK-8 assays the cytotoxicity of different treatment regimens. AGS cells were inoculated in 96-well plates at a density of 5000 cells per well and cultured overnight in a 5% CO2 incubator at 37℃. The cells were divided into 5 groups with 5 rewells in each group: (1) Control; (2) RT; (3) NPs; (4) NPs+INH; (5) NPs+INH+RT. On the second day, each group was added as required and incubated overnight. On the third day, 10 μL CCK-8 was added and incubated for 2 h. Then the absorbance at 450nm was determined using a microplate analyzer (Rayto-6000 system, Rayto, China).

***In vitro* Colony formation assay:** To detect the radiotherapy sensitization rate of NPs + INH, AGS cells were incubated in 6-well plates with 50, 100, 200, 400, 800 and 1000 cells per well for 24 h at 37℃. They were divided into 5 groups: (1) Control; (2) RT; (3) NPs; (4) NPs+INH; (5) NPs+INH+RT. The concentration of NPs and INH were 100 μg/mL and 20 μg/mL, respectively, and the radiation dose was 6 Gy. The cells were washed for 3 times before X-ray irradiation. After 15 days, they were stained with crystal violet dye.

**Flow cytometry:** AGS cells were incubated in a six-well plate at 37℃ for 24 h and divided into 5 groups: (1) Control; (2) RT; (3) NPs; (4) NPs+INH; (5) NPs+INH+RT. After corresponding experimental operation, the cells were incubated at 37℃ for 24 h. After collection, the cells were resuspended in DCFH-DA with a concentration of 10 μmol/L, and incubated at 37℃ for 20 min. Every 5 minutes, the mixture was reversed to allow full contact between the probe and the cells, and the cells were washed with serum-free medium for three times and detected by flow cytometry. For cell apoptosis, after various treatments, cells were collected and stained for fluorescence detection by flow cytometry.

**Fluorescence analysis of intracellular ROS:** AGS Cells were incubated in a six-well plate at 37℃ for 24 h and divided into 5 groups: (1) Control; (2) RT; (3) NPs; (4) NPs+INH; (5) NPs+INH+RT. After corresponding experimental operation, the cells were incubated at 37℃ for 4 h. The old culture medium was removed, diluted DCFH-DA was added to the six-well plate, and the cells were cultured at 37℃ for 20 min. The cells were washed with serum-free culture medium for three times, and then the ROS fluorescence level was directly observed using a Japanese laser confocal microscope.

**WB Analysis:** After various treatment, cells were collected for WB analysis. Apo Alert Caspase Profiling kit (Clontech, CA, USA) was used under standard operating procedures. Caspases 8, 9, 2 and 3 expressions were evaluated fluorimetrically using spectrofluorometer (FLx800, BioTek) with an excitation at 380 nm and emission: 460 nm.

***In vivo* Fluorescence Staining Sections:** The tumor bearing mice were divided into three groups administrated with (1) PBS (100 μL); (2) NPs (100 μL, 100 μg/mL); (3) NPs (100 μL, 100 μg/mL) under MF After 24 h post various treatment, pimonidazole hydrochloride (Hypoxyprobe, USA) were intraperitoneally administrated to each mouse at a dose of 30 mg/kg. Next, the tumors were surgically excised from the mice and then stained with the mouse antipimonidazole monoclonal antibody as the primary antibody to label the tumor hypoxia regions. The slices were stained with the Alexa Fluor 488-conjugated goat anti-mouse secondary antibody and 2-(4-Amidinophenyl)-6-indolecarbamidine dihydrochloride. Finally, the images of the stained slices were characterized using confocal laser scanning microscopy (CLSM; Zeiss LSM 710). For HIF-1α staining, 24 h post injection, the tumor be effectively stained with HIF-1α. The subsequent treatment of HIF-1α tumor components was achieved through MATLAB software.

**Histology Analysis:** After 19 days of treatment, the mice were euthanized, and the main organs, including the heart, liver, spleen, lung and kidney, and the tumors, were fixed with 4% formaldehyde and embedded with paraffin. DCF was used to stain the tumor sections and fluorescence microscope was used to analyze the ROS in the tumor. The main organs and tumors were treated with hematoxylin and eosin (HE), TUNEL and Ki-67 staining, and observed with light microscopy for histological analysis.

**MR imaging in vitro and in vivo**: 4.7 T MR scanner was used for imaging (Brucker). For T1- and T2- weighed imaging, NPs with various concentration was added with 1 mM GSH. For in vivo imaging, tumor-bearing mice was administrated with NPs (100 μL, 100 μg/mL) with or without MF. The scanning was conducted 24 h post the injection. A linear fitting model was applied for T1-/T2-weighed relaxation time calculation.


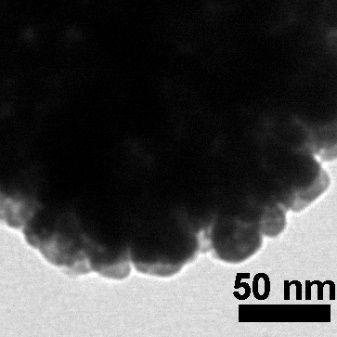


**Figure S1.** Extensive TEM images of NPs.


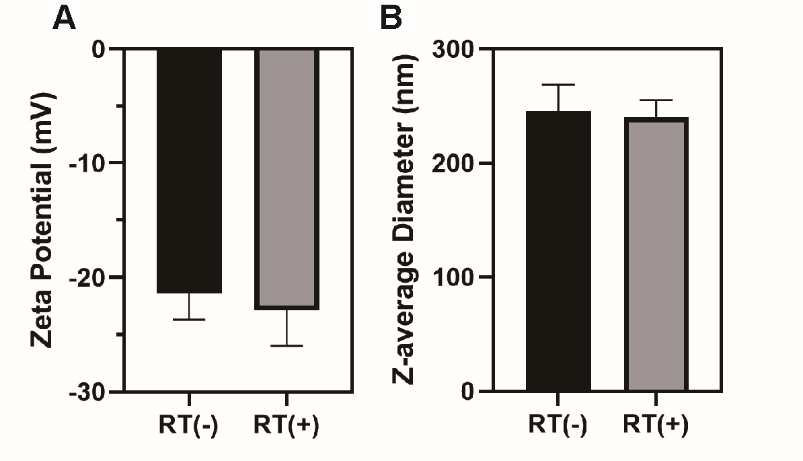


**Figure S2**. (A) Zeta potential and (B) Zeta diameter of NPs before and after RT.


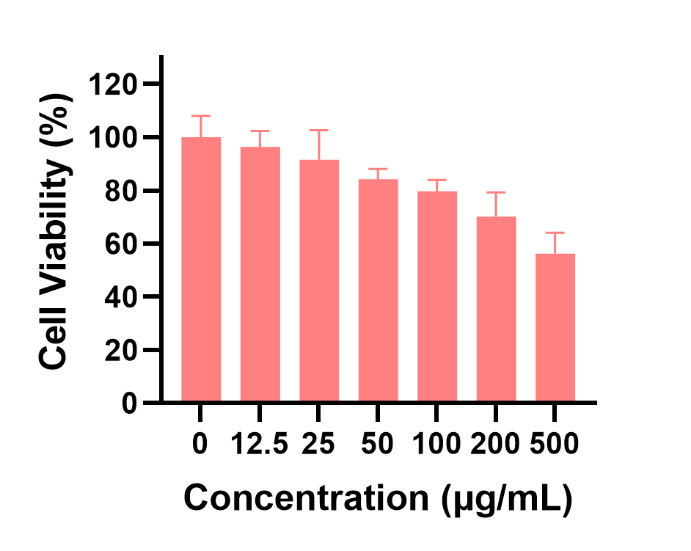


**Figure S3**. Cell viability under various concentration of NPs.


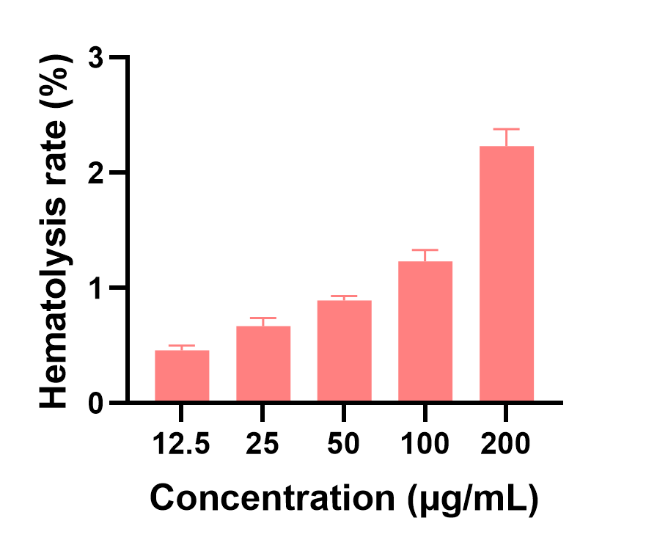


**Figure S4**. Hematolysis rate under various concentration of NPs.


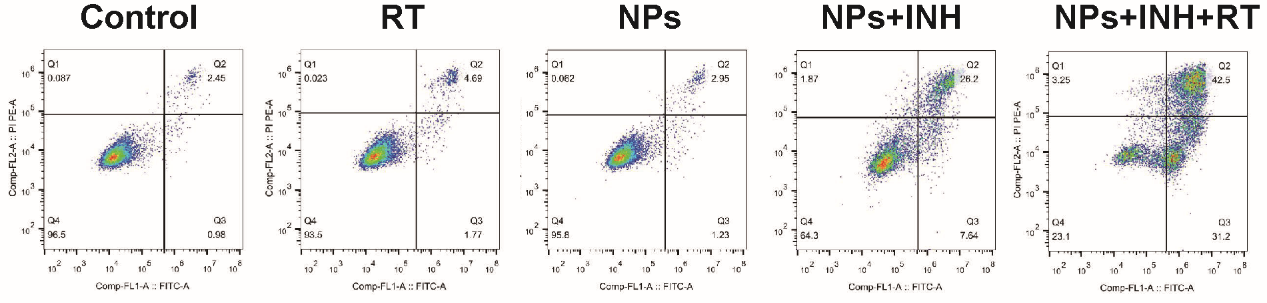


**Figure S5**. Flow cytometry analysis of cells apoptosis with various treatments.


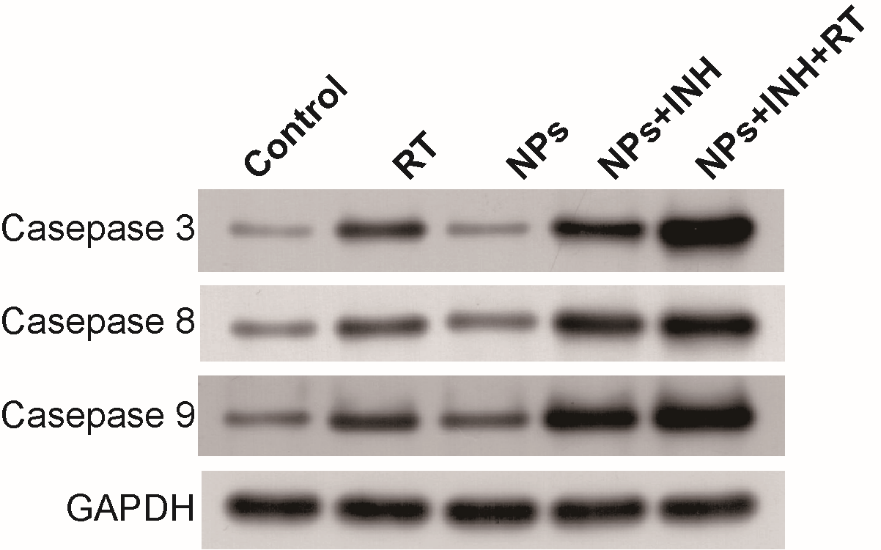


**Figure S6.** WB results after various treatments.


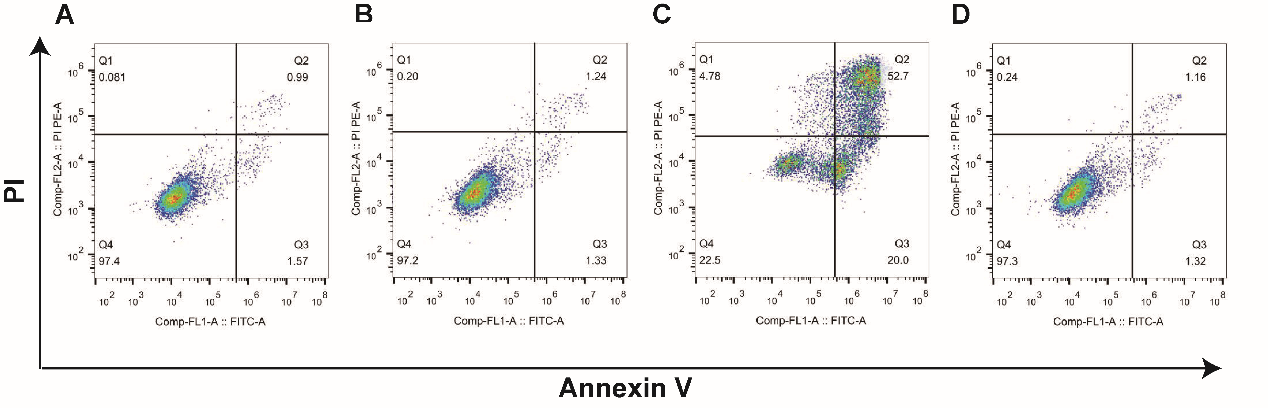


**Figure S7**. Flow cytometry analysis of cells to determine the effect of caspase inhibitor. Cells were subjected with (A) PBS, (B) Z-VAD-FMK, (C) NPs+INH+RT and (D) NPs+INH+RT with Z-VAD-FMK.


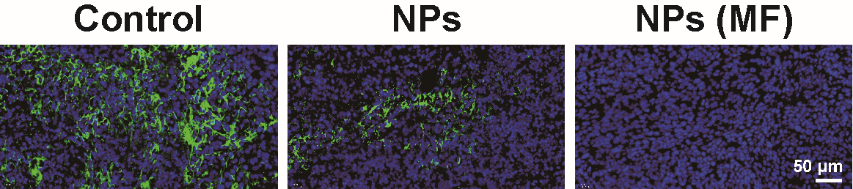


**Figure S8**. HIF-1α staining of tumor slices after various treatments.


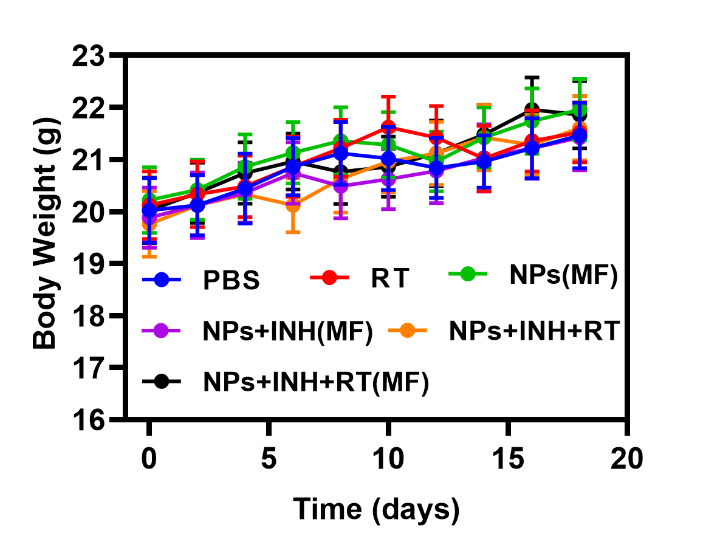


**Figure S9.** Body weight after various treatments.


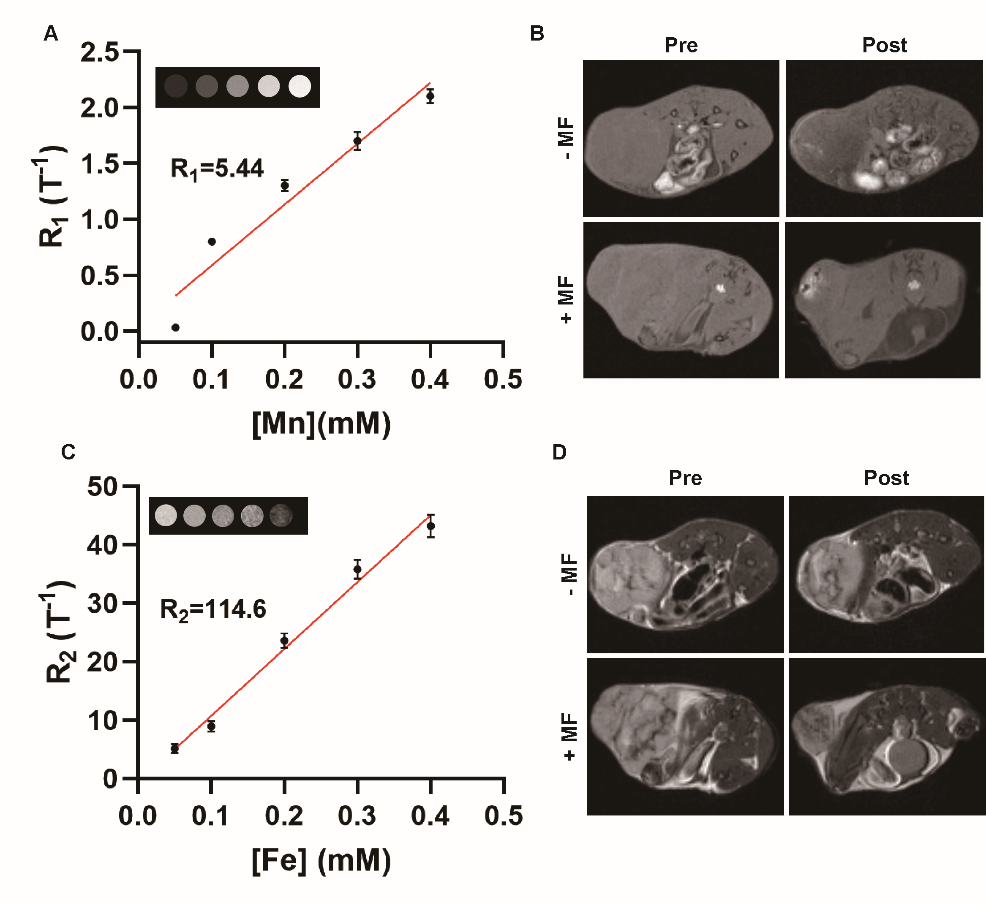


**Figure S10**. MR imaging. (A) T1-weighed imaging and longitudinal relaxation rate (R1) fitting of solution at various concentration. (B) T1-weighed imaging of tumor on mice. (C) T2-weighed imaging and longitudinal relaxation rate (R2) fitting of solution at various concentration. (D) T2-weighed imaging of tumor on mice.
